# Supplementary material for: The cues of colony size: how honey bees sense that their colony is large enough to begin to invest in reproduction
Source: Oxford University Press journal article supplement (doi:10.1242/jeb.150342), 2017-05-01
Supplement: jeb150342supp.pdf [file jeb150342supp.pdf]

## SUPPLEMENTARY INFORMATION

Table S1: Honey bee activity codes, based on [19], with additional tasks added and their order reorganized. The 7 general task descriptions were for statistical analyses only.

| Code | Specific Task                                                        | General Task       |
|------|----------------------------------------------------------------------|--------------------|
| 1    | Walking                                                              | Walking            |
| 2    | Resting                                                              | Resting            |
| 3    | Grooming self                                                        | Worker maintenance |
| 4    | Grooming other                                                       | Worker maintenance |
| 5    | Groomed by other                                                     | Worker maintenance |
| 6    | Inspecting empty/egg cell                                            | Hive maintenance   |
| 7    | Inspecting larvae                                                    | Nursing            |
| 8    | Into pollen cell                                                     | Hive maintenance   |
| 9    | Into honey cell                                                      | Hive maintenance   |
| 10   | Cleaning cell (deep in cell, abdomen moving, bee is rotating)        | Hive maintenance   |
| 11   | Sleeping (deep in cell, not rotating, abdomen is pulsating)          | Resting            |
| 12   | Feeding worker (other bee's proboscis between focal bee's mandibles) | Worker maintenance |
| 13   | Fed by worker (proboscis extended)                                   | Worker maintenance |
| 14   | Beg for food (worker antennates another, exchange food)              | Worker maintenance |
| 15   | Antennate with worker, no food exchanged                             | Worker maintenance |
| 16   | Attend queen                                                         | Worker maintenance |
| 17   | Feed queen                                                           | Worker maintenance |
| 18   | In festoon                                                           | In festoon         |
| 19   | Building comb with new wax                                           | Hive maintenance   |

|    |                                                                        |                    |
|----|------------------------------------------------------------------------|--------------------|
| 20 | Mouthing sealed brood                                                  | Nursing            |
| 21 | Mouthing sealed honey                                                  | Hive maintenance   |
| 22 | Chew on wood in hive                                                   | Hive maintenance   |
| 23 | Chew on wax in hive                                                    | Hive maintenance   |
| 24 | Working with propolis                                                  | Hive maintenance   |
| 25 | Chew pollen on worker                                                  | Hive maintenance   |
| 26 | Uncap brood                                                            | Worker maintenance |
| 27 | Capping brood                                                          | Nursing            |
| 28 | Capping honey                                                          | Hive maintenance   |
| 29 | Extend mouthparts to ripen honey<br>(fluid bubble at end of proboscis) | Hive maintenance   |
| 30 | Fanning                                                                | Hive maintenance   |
| 31 | Undertaker (holding a dead bee)                                        | Hive maintenance   |
| 32 | Tremble dance (lateral wiggle<br>resembling the dance of St. Vitus)    | Foraging           |
| 33 | Shaking signal (rapid up and down atop<br>another bee)                 | Foraging           |
| 34 | Waggle dance (forager)                                                 | Foraging           |
| 35 | Attending waggle dance                                                 | Foraging           |
| 36 | Guarding at entrance                                                   | Foraging           |
| 37 | Orientation flight (zigzag at entrance,<br>but bee does not depart)    | Foraging           |
| 38 | Exiting hive                                                           | Foraging           |
| 39 | Entering hive                                                          | Foraging           |
| 40 | Returning forager with pollen                                          | Foraging           |
| 41 | Returning forager with propolis                                        | Foraging           |
| 42 | Unloading nectar                                                       | Foraging           |
| 43 | Foraging outside of the colony                                         | Foraging           |
